# Supplementary material
Source: PubMed Central journal article supplement (PMC8068643)
Supplement: NIHMS1687498-supplement-1687498_Sup.pdf [file NIHMS1687498-supplement-1687498_Sup.pdf]

|                              | No Zoledronic Acid (N = 59) | Zoledronic Acid (N = 60) |
|------------------------------|-----------------------------|--------------------------|
| Deceased, N (%)              | 23 (38.9)                   | 27 (45)                  |
| Follow-Up > 13 years, N (%)  | 29 (49.2)                   | 23 (38.3)                |
| Follow-Up 10-13 years, N (%) | 6 (10.2)                    | 4 (6.7)                  |
| Follow-Up 5-10 years, N (%)  | 1 (1.7)                     | 3 (5)                    |
| Follow-Up < 5 years, N (%)   | 0                           | 3 (5)                    |

**Table S1** Length of patient follow-up

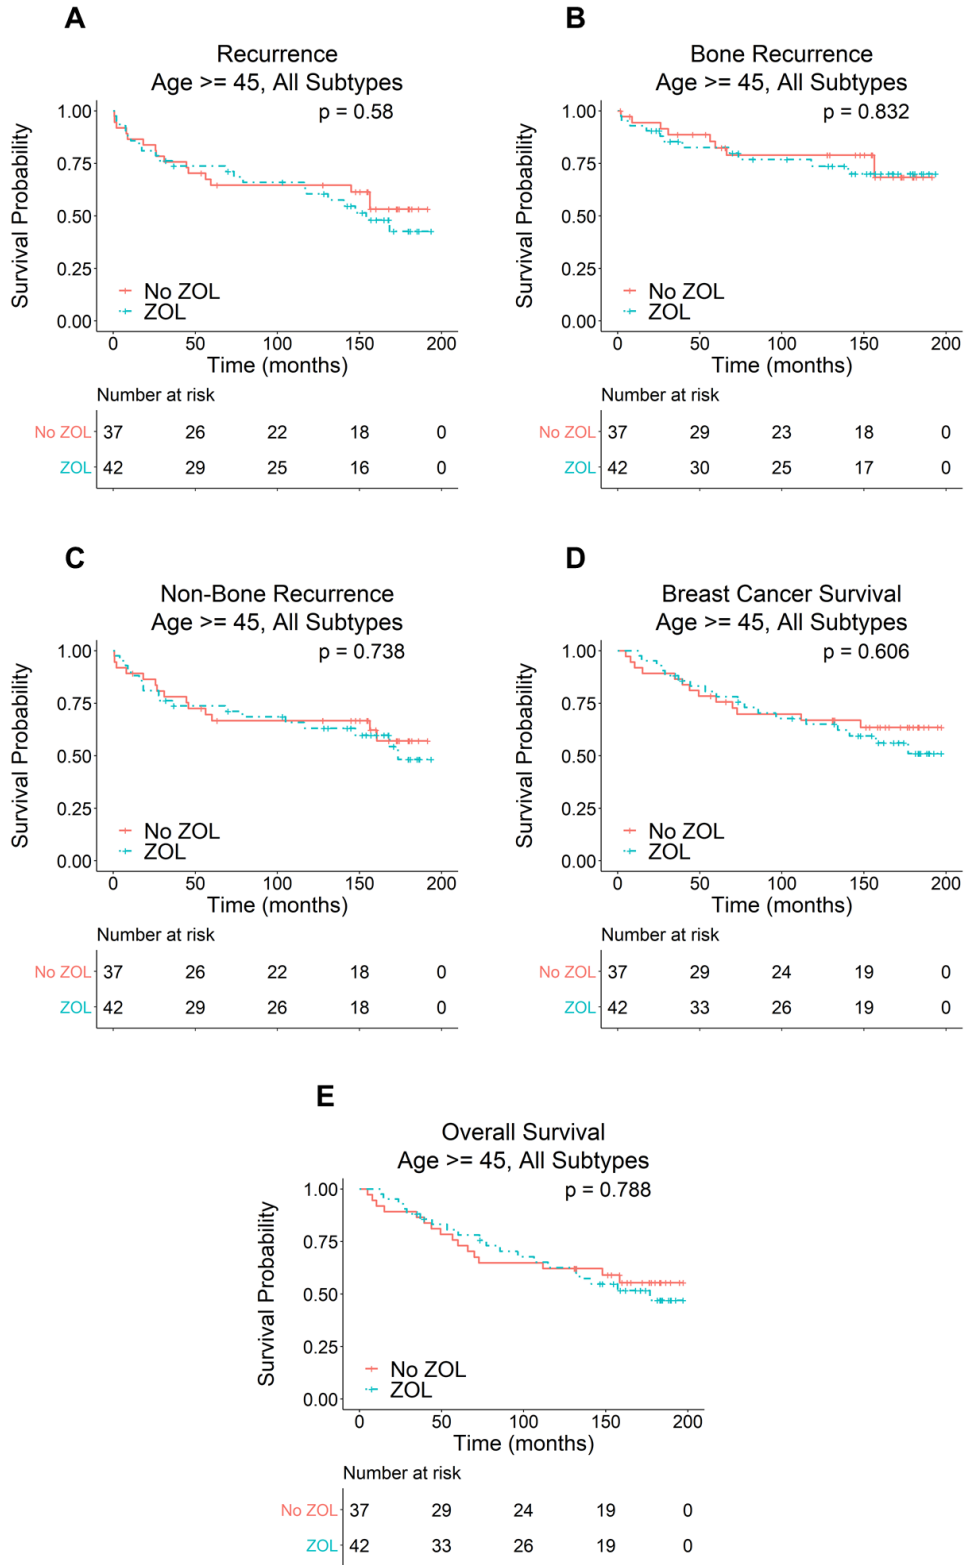

**Fig. S1** Effect of ZOL treatment on TTR (A), TTBR (B), TTNBR (C), BCS (D) and OS (E) in patients 45 years of age and older

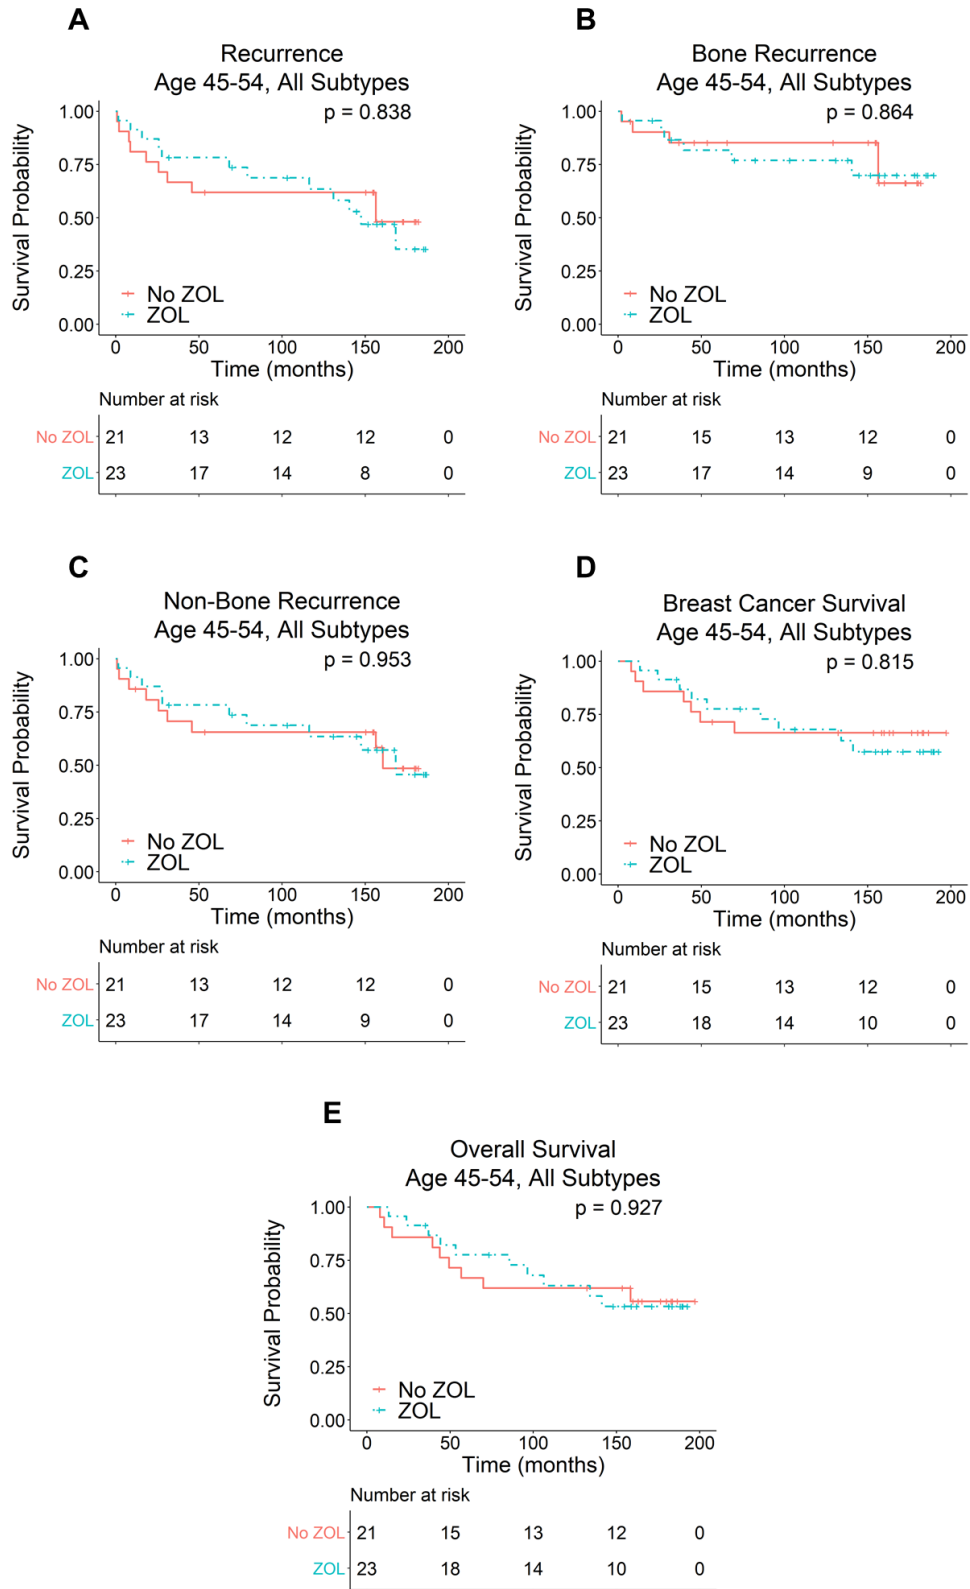

**Fig. S2** Effect of ZOL treatment on TTR (A), TTBR (B), TTNBR (C), BCS (D) and OS (E) in patients age 45-54

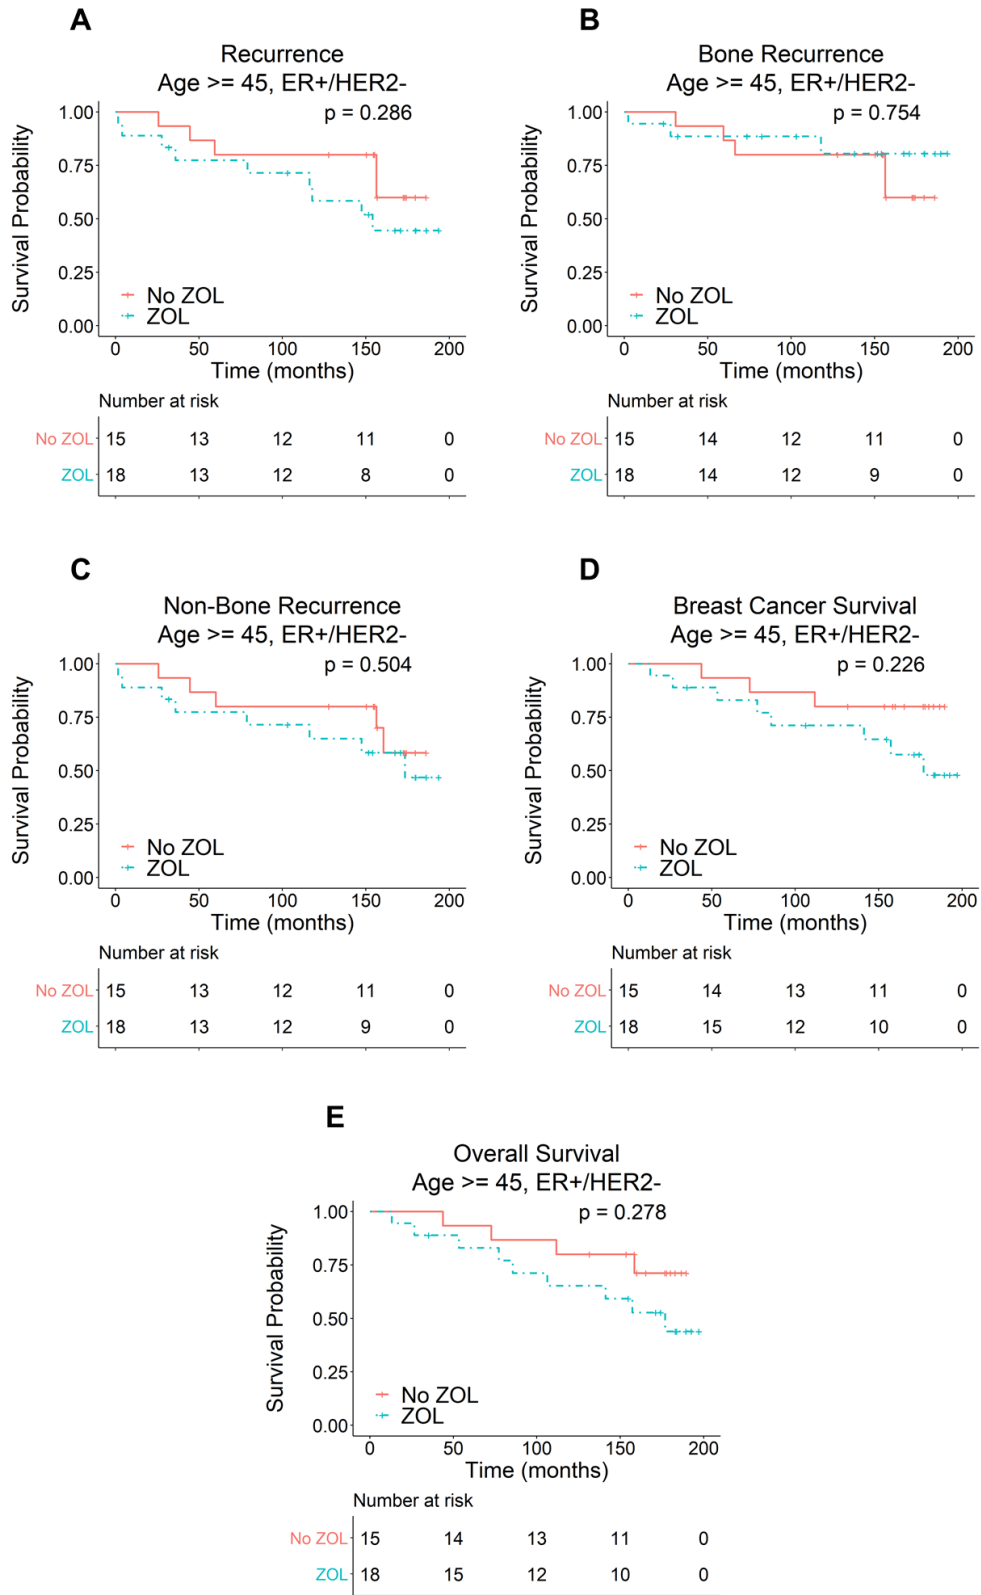

**Fig. S3** Effect of ZOL treatment on TTR (A), TTBR (B), TTNBR (C), BCS (D) and OS (E) in ER+/HER2- patients 45 years of age and older

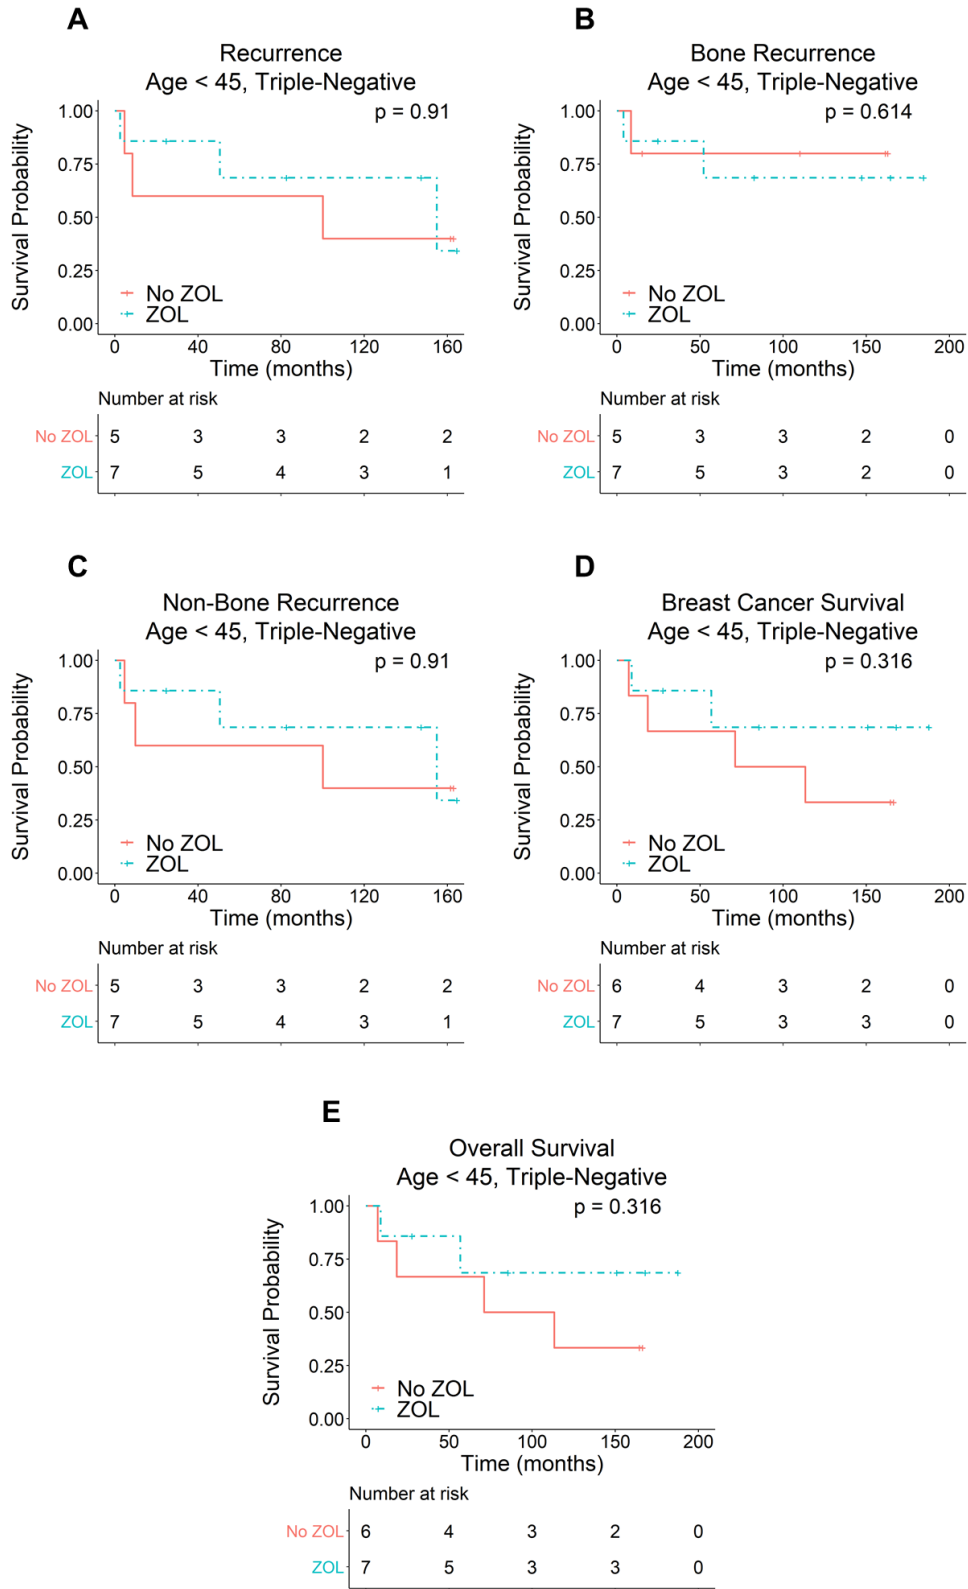

**Fig. S4** Effect of ZOL treatment on TTR (A), TTBR (B), TTNBR (C), BCS (D) and OS (E) in triple-negative patients younger than 45

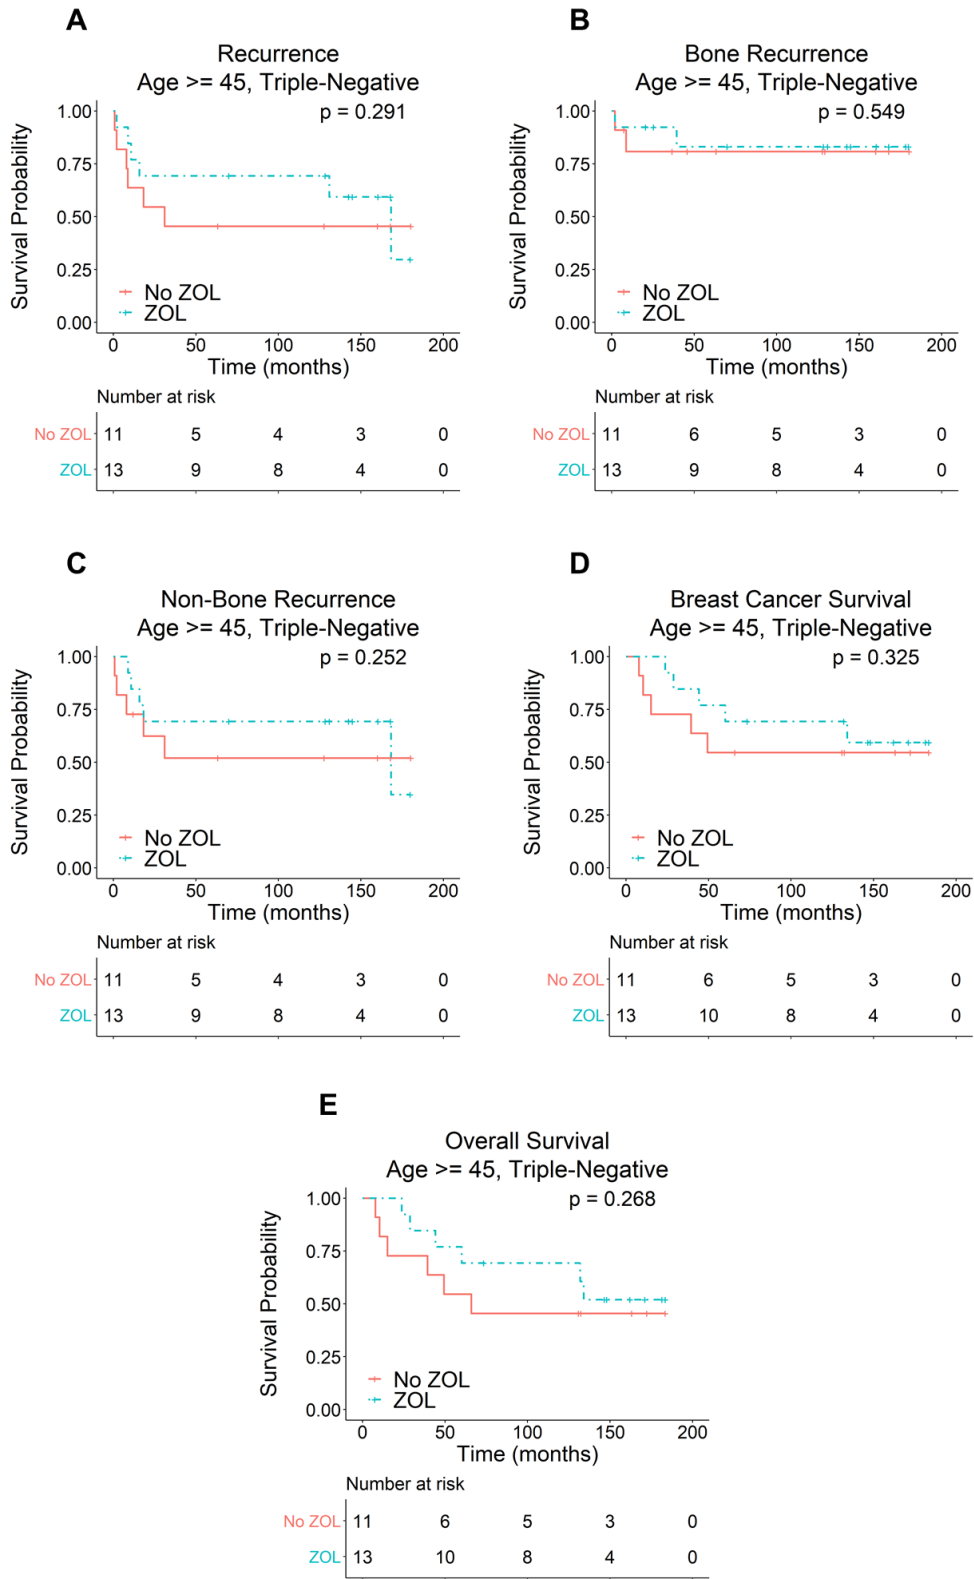

**Fig. S5** Effect of ZOL treatment on TTR (A), TTBR (B), TTNBR (C), BCS (D) and OS (E) in triple-negative patients 45 years of age and older

|                        | TAM (%)  | AI (%)    | OS + TAM (%) | OS + AI (%) | Unknown (%) |
|------------------------|----------|-----------|--------------|-------------|-------------|
| <b>Age &lt; 45</b>     |          |           |              |             |             |
| <b>No ZOL (N = 14)</b> | 7 (50)   | 3 (21.4)  | 4 (28.6)     | 0           | 0           |
| <b>ZOL (N = 8)</b>     | 4 (50)   | 2 (25)    | 1 (12.5)     | 0           | 1 (12.5)    |
| <b>Age &gt;= 45</b>    |          |           |              |             |             |
| <b>No ZOL (N = 15)</b> | 4 (26.7) | 9 (60)    | 0            | 0           | 2 (13.3)    |
| <b>ZOL (N = 18)</b>    | 4 (22.2) | 11 (61.1) | 1 (5.6)      | 1 (5.6)     | 1 (5.6)     |

TAM = tamoxifen, AI = aromatase inhibitor, OS = ovarian suppression

**Table S2** Endocrine therapy in ER+/HER2- patients
